# Supplementary material for: Two novel nickel cluster substituted polyoxometalates: syntheses, structures and their photocatalytic activities, magnetic behaviors, and proton conduction properties
Source: Royal Society of Chemistry journal article supplement (doi:10.1039/d0qi01410a), 2021-01-01
Supplement: d0qi01410a1.pdf [file d0qi01410a1.pdf]

## ***Electronic Supplementary Information***

### **Two novel nickel cluster substituted polyoxometalates: syntheses, structures and their photocatalytic activities, magnetic behaviors, and ion-conduction properties**

Yi Chen,<sup>a</sup> Zheng-Wei Guo,<sup>a</sup> Ya-Peng Chen,<sup>b</sup> Zan-Yong Zhuang,<sup>b</sup> Guo-Qiang Wang,<sup>b</sup> Xin-Xiong Li<sup>\*a</sup>, Shou-Tian Zheng<sup>\*a</sup> and Guo-Yu Yang<sup>\*c</sup>

<sup>a</sup> College of Chemistry, Fuzhou University, Fuzhou, Fujian 350108, China.

<sup>b</sup> Key Laboratory of Advanced Materials Technologies, College of Materials Science and Engineering, Fuzhou University, Fuzhou, Fujian 350108, People's Republic of China.

<sup>c</sup> MOE Key Laboratory of Cluster Science, School of Chemistry and Chemical Engineering, Beijing Institute of Technology, Beijing, 100081, China

\*Email: [lxz@fzu.edu.cn](mailto:lxz@fzu.edu.cn); [stzheng@fzu.edu.cn](mailto:stzheng@fzu.edu.cn); [ygy@bit.edu.cn](mailto:ygy@bit.edu.cn)

## **Contents**

|                                    |                |
|------------------------------------|----------------|
| <b>1. Additional Figures</b> ..... | <b>S2-S5</b>   |
| <b>2. Additional Tables</b> .....  | <b>S6-S10</b>  |
| <b>3. References</b> .....         | <b>S11-S13</b> |

## 1. Additional Figures

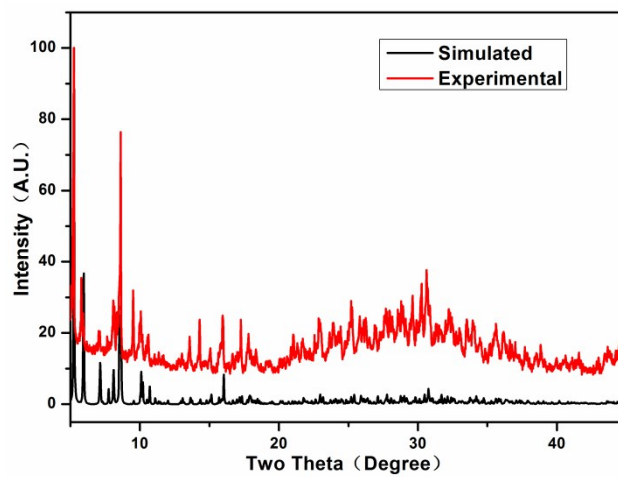

Fig. S1 Simulated and experimental PXRD patterns of **1**.

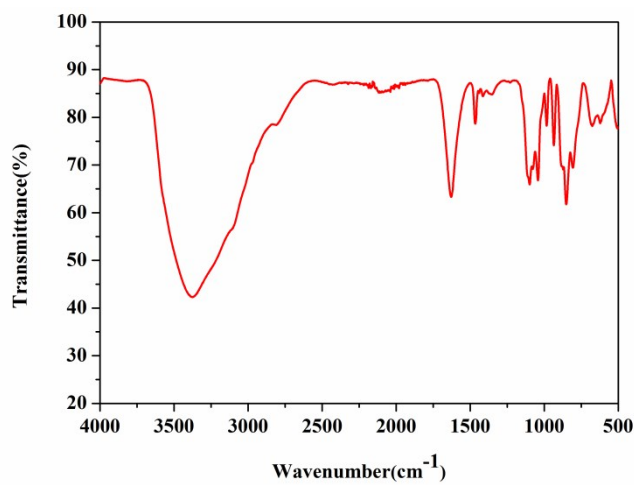

Fig. S2 IR spectrum of **1**.

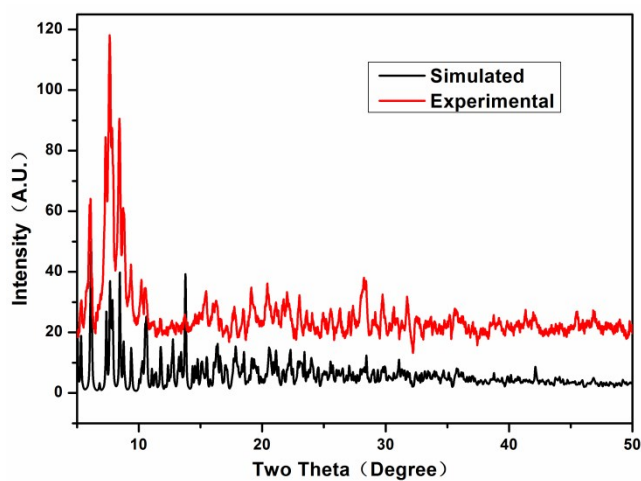

Fig. S3 Simulated and experimental PXRD patterns of **2**.

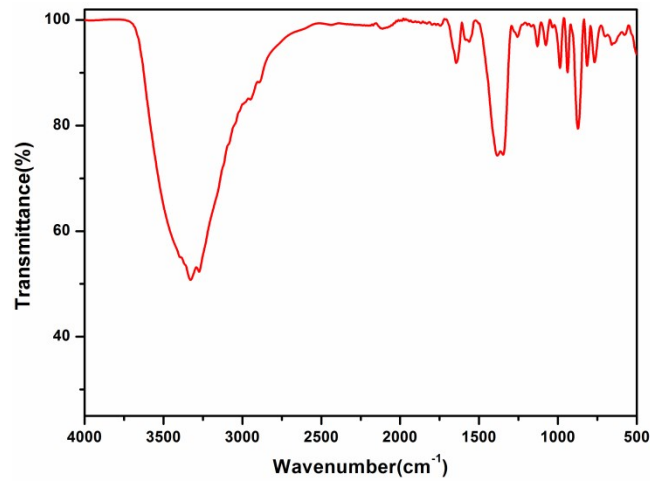

Fig. S4 IR spectrum of 2.

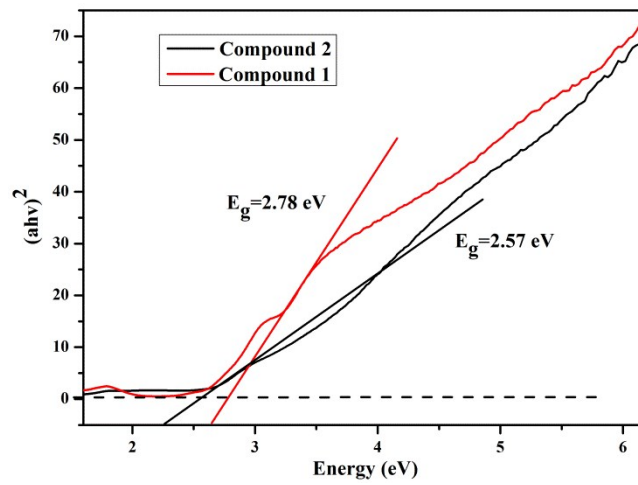

Fig. S5 Tauc plots of 1 and 2.

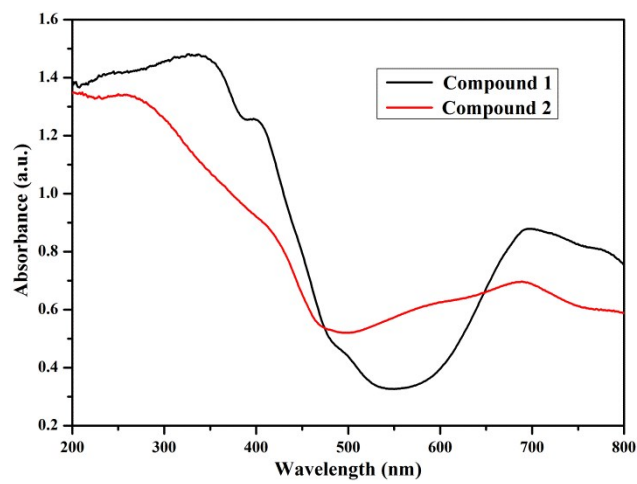

Fig. S6 UV-Vis spectra of 1 and 2.

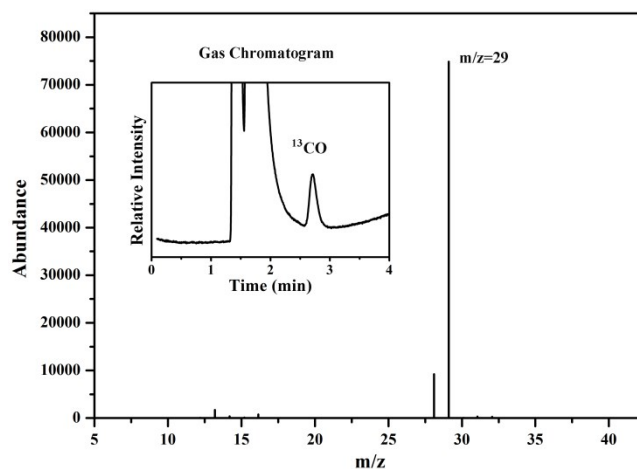

**Fig. S7** Gas chromatogram and mass spectrum analysis of the carbon source of the evolved CO in the photocatalytic reduction of  $^{13}\text{CO}_2$  by **2**.

The peak at 2.7 min with  $m/z = 29$  is assigned to the generated  $^{13}\text{CO}$ , confirming that the produced and detected CO originates from  $\text{CO}_2$ .

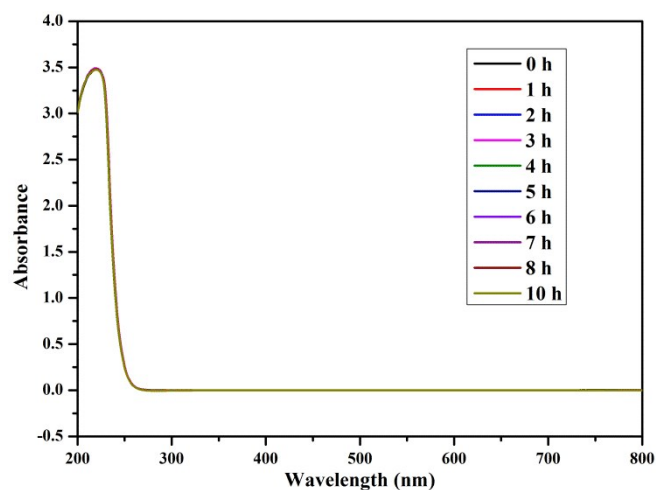

**Fig. S8** Time-dependent UV-Vis spectrum of **2** ( $1.7 \times 10^{-5}$  M) in the solution (MeCN : TEOA :  $\text{H}_2\text{O} = 4 : 1 : 1$ , v : v : v). The UV-Vis curves remained unchanged with time.

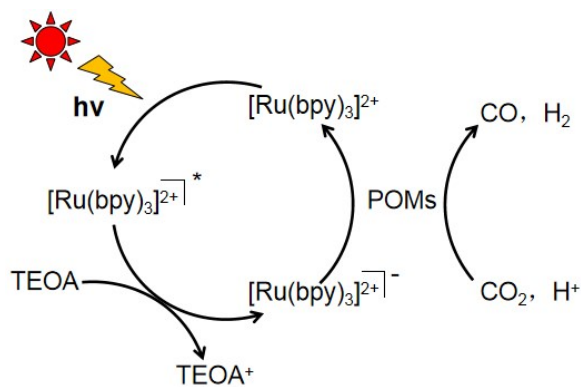

**Fig. S9** Proposed mechanism for the photoreduction of  $\text{CO}_2$ .

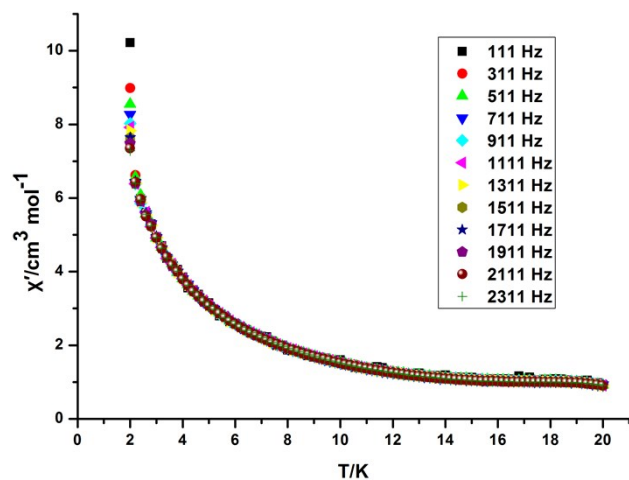

Fig. S10 Frequency dependence of real  $\chi'_m$  component in the temperature range of 2-20 K for 1.

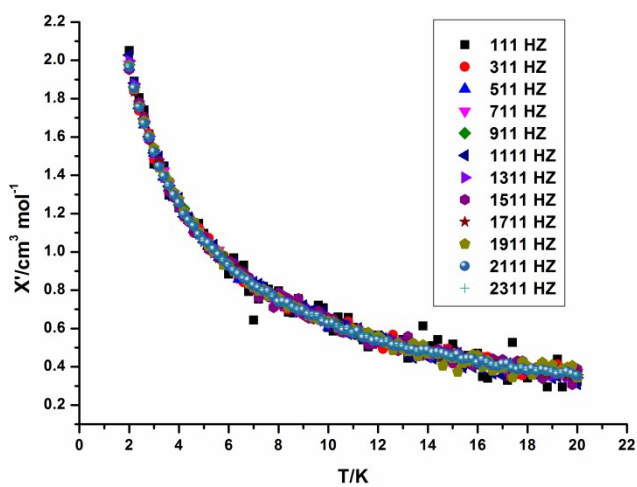

Fig. S11 Frequency dependence of real  $\chi'_m$  component in the temperature range of 2-20 K for 2.

## 2. Additional Tables

**Table S1.** Summary of reported nickel cluster-substituted POMs

| Formula                                                                                                                                                                                                                  | TM core type <sup>a</sup> | Diagram                                                                             | lacunary POM fragments                                                       | ref |
|--------------------------------------------------------------------------------------------------------------------------------------------------------------------------------------------------------------------------|---------------------------|-------------------------------------------------------------------------------------|------------------------------------------------------------------------------|-----|
| $[(\text{Ni}(\text{H}_2\text{O}))_2\text{Ni}_3(\text{PW}_{10}\text{O}_{37})]^{6-}$                                                                                                                                       | {Ni <sub>2</sub> }        | 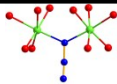   | {PW <sub>10</sub> O <sub>37</sub> }                                          | 1   |
| $[\text{Li}_2\text{Ni}_2(\text{PW}_9\text{O}_{34})_2]^{12-}$                                                                                                                                                             | {Ni <sub>2</sub> }        |                                                                                     | {PW <sub>9</sub> O <sub>34</sub> }                                           | 2   |
| $[\text{M}_2(\text{B}-\beta\text{-SiW}_8\text{O}_{31})_2]^{16-}$                                                                                                                                                         | {Ni <sub>2</sub> }        |    | {B-β-SiW <sub>8</sub> O <sub>31</sub> }                                      | 3   |
| $[\text{Na}_2(\text{H}_2\text{O})_2\text{Ni}_2(\text{As}_2\text{W}_{15}\text{O}_{56})_2]^{18-}$                                                                                                                          | {Ni <sub>2</sub> }        |                                                                                     | {As <sub>2</sub> W <sub>15</sub> O <sub>56</sub> }                           | 4   |
| $[\text{M}^{II}_2(\text{P}_2\text{W}_{15}\text{O}_{56})_2]^{20-}$ (M = Mn, Co, or Ni)                                                                                                                                    | {Ni <sub>2</sub> }        |                                                                                     | {P <sub>2</sub> W <sub>15</sub> O <sub>56</sub> }                            | 5   |
| $[\text{Ni}_3\text{Na}(\text{H}_2\text{O})_2(\text{AsW}_9\text{O}_{34})_2]^{11-}$                                                                                                                                        | {Ni <sub>3</sub> }        |                                                                                     | {AsW <sub>9</sub> O <sub>34</sub> }                                          | 6   |
| $[\text{Ni}_3\text{Na}(\text{H}_2\text{O})_2(\text{PW}_9\text{O}_{34})_2]^{11-}$                                                                                                                                         | {Ni <sub>3</sub> }        |                                                                                     | {PW <sub>9</sub> O <sub>34</sub> }                                           | 7   |
| $[\text{NaNi}_3(\text{H}_2\text{O})_2(\text{P}_2\text{W}_{15}\text{O}_{56})_2]^{17-}$                                                                                                                                    | {Ni <sub>3</sub> }        |    | {P <sub>2</sub> W <sub>15</sub> O <sub>56</sub> }                            | 8   |
| $[\text{Ni}_3(\text{OH})_3(\text{H}_2\text{O})_3\text{P}_2\text{W}_{16}\text{O}_{59}]^9$                                                                                                                                 | {Ni <sub>3</sub> }        |    | {P <sub>2</sub> W <sub>16</sub> O <sub>59</sub> }                            | 9   |
| $[\text{Ni}_6\text{As}_5\text{W}_{24}\text{O}_{94}(\text{H}_2\text{O})_2]^{17-}$                                                                                                                                         | 2{Ni <sub>3</sub> }       |                                                                                     | {AsW <sub>9</sub> O <sub>34</sub> }<br>{AsW <sub>6</sub> O <sub>16</sub> }   | 6   |
| $[\text{Na}_3(\text{H}_2\text{O})_8\{\text{Ni}_3(\text{H}_2\text{O})(\text{PW}_9\text{O}_{34})(\text{PW}_8\text{O}_{31})_2\}]^{21-}$                                                                                     | 2{Ni <sub>3</sub> }       |                                                                                     | {PW <sub>9</sub> O <sub>34</sub> } {PW <sub>8</sub> O <sub>31</sub> }        | 10  |
| $\{[\text{Ni}(\text{Hen})]_2\text{Ni}_2(\text{GeW}_9\text{O}_{34})_2\}^{10-}$                                                                                                                                            | {Ni <sub>4</sub> }        |   | {GeW <sub>9</sub> O <sub>34</sub> }                                          | 11  |
| $[\text{Na}\{(\text{A}-\alpha\text{-SiW}_9\text{O}_{34})\text{Ni}_4(\text{CH}_3\text{COO})_3(\text{OH})_3\}_2]^{15-}$                                                                                                    | {Ni <sub>4</sub> }        |                                                                                     | {A-α-SiW <sub>9</sub> O <sub>34</sub> }                                      | 12  |
| $[(\text{SiW}_9\text{O}_{34})\text{KNi}_4(\text{OH})_3(\text{SC}_4\text{H}_3\text{CH}_2\text{COO})_3]^{7-}$                                                                                                              | {Ni <sub>4</sub> }        |  | {SiW <sub>9</sub> O <sub>34</sub> }                                          | 13  |
| $[\text{Na}\{(\text{A}-\alpha\text{-SiW}_9\text{O}_{34})\text{Ni}_4(\text{CH}_3\text{COO})_3(\text{OH})_3\}_2]^{15-}$                                                                                                    | {Ni <sub>4</sub> }        |  | {A-α-SiW <sub>9</sub> O <sub>34</sub> }                                      | 14  |
| $[(\text{SiW}_9\text{O}_{34})(\text{OH})_3\text{Ni}_4(\text{C}_6\text{H}_{13}\text{NO}_2)_3]^{15-}$                                                                                                                      | {Ni <sub>4</sub> }        |                                                                                     | {SiW <sub>9</sub> O <sub>34</sub> }                                          | 15  |
| $[\text{Ni}_4(\text{Hdap})_2(\text{HXW}_9\text{O}_{34})_2]^{8-}$ (X= Si or Ge)                                                                                                                                           | {Ni <sub>4</sub> }        |  | {XW <sub>9</sub> O <sub>34</sub> }<br>(X= Si or Ge)                          | 16  |
| $[\text{Ni}_4(\text{H}_2\text{O})_2(\alpha\text{-B-PW}_9\text{O}_{34})_2]^{1-}$                                                                                                                                          | {Ni <sub>4</sub> }        |                                                                                     | {α-B-PW <sub>9</sub> O <sub>34</sub> }                                       | 17  |
| $\{\text{Ni}_4[\text{H}_4\text{N}_2(\text{CH}_2)_6]_2(\text{H}_2\text{PW}_9\text{O}_{34})_2\}^{2-}$                                                                                                                      | {Ni <sub>4</sub> }        |                                                                                     | {PW <sub>9</sub> O <sub>34</sub> }                                           | 18  |
| $\{[\text{Ni}(\text{enMe})_2]_2[\text{Ni}(\text{enMe})_2(\text{H}_2\text{O})_2][\text{As}_2\text{W}_{18}\text{Ni}_4(\text{enMe})_2\text{O}_{68}]\}$                                                                      | {Ni <sub>4</sub> }        |                                                                                     | {As <sub>2</sub> W <sub>18</sub> O <sub>68</sub> }                           | 19  |
| $\{[\beta\text{-GeNi}_2\text{W}_{10}\text{O}_{36}(\text{OH})_2(\text{H}_2\text{O})_2]^{12-}$                                                                                                                             | {Ni <sub>4</sub> }        |                                                                                     | {β-GeW <sub>10</sub> O <sub>36</sub> }                                       | 20  |
| $[\text{Ni}_4(\text{H}_2\text{O})_2(\alpha\text{-GeW}_9\text{O}_{34})_2]^{2-}$                                                                                                                                           | {Ni <sub>4</sub> }        |                                                                                     | {α-GeW <sub>9</sub> O <sub>34</sub> }                                        | 21  |
| $[\text{Ni}(\text{en})_2]_2\{[\alpha\text{-B-PW}_9\text{O}_{34}]_2\text{Ni}_4(\text{H}_2\text{O})_2\}[\text{Ni}(\text{en})_2(\text{H}_2\text{O})_2]^{2-}$                                                                | {Ni <sub>4</sub> }        |                                                                                     | {α-B-PW <sub>9</sub> O <sub>34</sub> }                                       | 22  |
| $\{\text{P}_2^{\text{V}}\text{W}_{18}^{\text{VI}}\text{Ni}_4(\text{H}_2\text{O})_2\text{O}_{68}[\text{Ni}(\text{en})_2(\text{H}_2\text{O})_2][\text{Ni}(\text{en})_3]_2[\text{Ni}(\text{en})_2(\text{H}_2\text{O})_2]\}$ | {Ni <sub>4</sub> }        |                                                                                     | {P <sub>2</sub> <sup>V</sup> W <sub>18</sub> <sup>VI</sup> O <sub>68</sub> } | 23  |
| $[\text{Ni}_4(\text{H}_2\text{O})_2(\text{B}-\alpha\text{-AsW}_9\text{O}_{34})_2]^{10-}$                                                                                                                                 | {Ni <sub>4</sub> }        |  | {B-α-AsW <sub>9</sub> O <sub>34</sub> }                                      | 24  |
| $\{\text{Ni}_4(\text{H}_2\text{O})_2(\text{B}-\alpha\text{-XW}_9\text{O}_{34})_2\}^{n-}$                                                                                                                                 | {Ni <sub>4</sub> }        |                                                                                     | {B-α-XW <sub>9</sub> O <sub>34</sub> }                                       | 25  |
| $\{(\text{GeW}_9\text{O}_{34})_2\text{Ni}_4(\text{Hen})_2\}^{10-}$                                                                                                                                                       | {Ni <sub>4</sub> }        |                                                                                     | {GeW <sub>9</sub> O <sub>34</sub> }                                          | 26  |
| $[\text{Ni}_4(\text{AsW}_9\text{O}_{34})_2(\text{H}_2\text{O})_2]^{10-}$                                                                                                                                                 | {Ni <sub>4</sub> }        |                                                                                     | {AsW <sub>9</sub> O <sub>34</sub> }                                          | 27  |
| $[\text{Ni}(\text{en})_2]_2\{[\text{Ni}_3(\text{en})_6(\text{H}_2\text{O})_2\text{Ni}_4(\text{H}_2\text{O})_2(\alpha\text{-PW}_9\text{O}_{34})_2]\}$                                                                     | {Ni <sub>4</sub> }        |                                                                                     | {α-PW <sub>9</sub> O <sub>34</sub> }                                         | 28  |

|                                                                                                                                                                                                                                                         |                    |                                                                                     |                                                               |    |
|---------------------------------------------------------------------------------------------------------------------------------------------------------------------------------------------------------------------------------------------------------|--------------------|-------------------------------------------------------------------------------------|---------------------------------------------------------------|----|
| $[\text{Ni}_4(\text{OH})_2(\text{AsW}_9\text{O}_{34})_2]^{10-}$                                                                                                                                                                                         | $\{\text{Ni}_4\}$  |                                                                                     | $\{\text{AsW}_9\text{O}_{34}\}$                               | 29 |
| $\{[\text{Ni}(\text{dien})]_2\text{Ni}_4(\text{H}_2\text{O})_2(\text{GeW}_9\text{O}_{34})_2\}^{6-}$                                                                                                                                                     | $\{\text{Ni}_4\}$  |                                                                                     | $\{\text{GeW}_9\text{O}_{34}\}$                               | 30 |
| $\{[\text{Ni}_4(\text{Hen})_2][\text{B}-\alpha\text{-AsW}_9\text{O}_{34}]_2\}^{8-}$                                                                                                                                                                     | $\{\text{Ni}_4\}$  |                                                                                     | $\{\text{B}-\alpha\text{-AsW}_9\text{O}_{34}\}$               | 31 |
| $[\text{Ni}_4(\text{H}_2\text{O})_2(\alpha\text{-B-HPW}_9\text{O}_{34})_2]^{10-}$                                                                                                                                                                       | $\{\text{Ni}_4\}$  |                                                                                     | $\{\alpha\text{-B-HPW}_9\text{O}_{34}\}$                      | 32 |
| $[\text{Na}\{(\text{A}-\alpha\text{-SiW}_9\text{O}_{34})\text{Ni}_4(\text{CH}_3\text{COO})_3(\text{OH})_2(\text{N}_3)_2\}]^{15-}$                                                                                                                       | $2\{\text{Ni}_4\}$ | 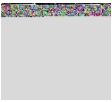   | $\{\text{A}-\alpha\text{-SiW}_9\text{O}_{34}\}$               | 12 |
| $\{[\text{SiW}_9\text{O}_{34})\text{Ni}_4(\text{OH})_3(\text{OOC}(\text{CH}_2)_3\text{COO})_6]^{32-}$                                                                                                                                                   | $4\{\text{Ni}_4\}$ |    | $\{\text{SiW}_9\text{O}_{34}\}$                               | 13 |
| $\{[\text{Ni}_5(\text{H}_2\text{O})_5(\text{OH})_3(\text{SiW}_9\text{O}_{34})(\text{SiW}_8\text{O}_{31})]^{13}$                                                                                                                                         | $\{\text{Ni}_5\}$  |    | $\{\text{SiW}_9\text{O}_{34}\} \{\text{SiW}_8\text{O}_{31}\}$ | 33 |
| $[\text{Ni}_5(\text{OH})_6(\text{OH}_2)_3(\text{Si}_2\text{W}_{18}\text{O}_{66})]^{12-}$                                                                                                                                                                | $\{\text{Ni}_5\}$  |    | $\{\text{Si}_2\text{W}_{18}\text{O}_{66}\}$                   | 34 |
| $\{[\text{Ni}_5(\text{OH})_3(\text{H}_2\text{O})_4(\text{CH}_3\text{CO}_2)]\{\text{Si}_2\text{W}_{18}\text{O}_{66}\}^2$                                                                                                                                 | $\{\text{Ni}_5\}$  |    | $\{\text{Si}_2\text{W}_{18}\text{O}_{66}\}$                   | 35 |
| $[\text{Ni}_5(\text{OH})_3(\text{trzS})_3(\text{en})(\text{H}_2\text{O})(\text{B}-\alpha\text{-PW}_9\text{O}_{34})]^{8-}$                                                                                                                               | $\{\text{Ni}_5\}$  |    | $\{\text{B}-\alpha\text{-PW}_9\text{O}_{34}\}$                | 36 |
| $[\text{Ni}_4(\text{H}_2\text{O})_2(\alpha\text{-NiW}_9\text{O}_{34})_2]^{16-}$                                                                                                                                                                         | $\{\text{Ni}_6\}$  |    | $\{\alpha\text{-NiW}_9\text{O}_{34}\}$                        | 37 |
| $[\text{Ni}_6(\text{imi})_6(\text{H}_3\text{AsW}_9\text{O}_{33})_2]$                                                                                                                                                                                    | $\{\text{Ni}_6\}$  |   | $\{\text{AsW}_9\text{O}_{33}\}$                               | 38 |
| $\{[\text{Ni}_6(\text{H}_2\text{O})_4(\mu_2\text{-H}_2\text{O})_4(\mu_3\text{-OH})_2(\text{X-SiW}_9\text{O}_{34})_2]^{10-}$                                                                                                                             | $\{\text{Ni}_6\}$  |  | $\{\text{SiW}_9\text{O}_{34}\}$                               | 39 |
| $\{[\text{Ni}_6(\text{en})_2(\text{H}_2\text{O})_2][\text{B}-\alpha\text{-GeW}_9\text{O}_{34}]_2\}^{6-}$                                                                                                                                                | $\{\text{Ni}_6\}$  |  | $\{\text{B}-\alpha\text{-GeW}_9\text{O}_{34}\}$               | 40 |
| $\{[\text{Ni}_6(\text{OH})_3(\text{en})_3(\text{H}_2\text{O})_6](\text{GeW}_9\text{O}_{34})\}^-$                                                                                                                                                        | $\{\text{Ni}_6\}$  |                                                                                     | $\{\text{GeW}_9\text{O}_{34}\}$                               | 41 |
| $[\text{Ni}_6(\text{OH})_3(\text{H}_2\text{O})_6(\text{dap})_3(\text{XW}_9\text{O}_{34})]^-$ (X= Si or P)                                                                                                                                               | $\{\text{Ni}_6\}$  |                                                                                     | $\{\text{XW}_9\text{O}_{34}\}$<br>(X= Si or P)                | 42 |
| $[\text{Ni}_6(\text{en})_3(\text{H}_2\text{O})_6\text{P}_2\text{W}_{15}]^{3-}$                                                                                                                                                                          | $\{\text{Ni}_6\}$  |                                                                                     | $\{\text{P}_2\text{W}_{15}\text{O}_{56}\}$                    | 43 |
| $\{[\text{Ni}_6(\mu_3\text{-OH})_3(\text{en})_3(\text{H}_2\text{O})_6](\text{B}-\alpha\text{-PW}_9\text{O}_{34})\}$                                                                                                                                     | $\{\text{Ni}_6\}$  |                                                                                     | $\{\text{B}-\alpha\text{-PW}_9\text{O}_{34}\}$                | 44 |
| $[\text{Ni}_6(\mu_3\text{-OH})_3(\text{H}_2\text{O})_6\text{L}_3(\text{B}-\alpha\text{-PW}_9\text{O}_{34})]$                                                                                                                                            | $\{\text{Ni}_6\}$  |                                                                                     | $\{\text{B}-\alpha\text{-PW}_9\text{O}_{34}\}$                | 45 |
| $\{[\text{Ni}_3(\text{dap})(\text{H}_2\text{O})_2]_2(\text{H}_2\text{W}_4\text{O}_{16})\}\{(\alpha\text{-H}_2\text{AsW}_6\text{O}_{26})[\text{Ni}_6(\text{OH})_2(\text{H}_2\text{O})(\text{dap})_2](\text{B}-\alpha\text{-HASW}_9\text{O}_{34})\}^{4-}$ | $\{\text{Ni}_6\}$  |  | $\{\text{B}-\alpha\text{-HASW}_9\text{O}_{34}\}$              | 46 |
| $[\text{Ni}_6(\mu_3\text{-OH})_3(\text{H}_2\text{O})_6(\text{en})_3(\text{B}-\alpha\text{-PW}_9\text{O}_{34})]$                                                                                                                                         | $\{\text{Ni}_6\}$  |                                                                                     | $\{\text{B}-\alpha\text{-PW}_9\text{O}_{34}\}$                | 47 |
| $[\text{Ni}_6(\text{enMe})_3(\text{OH})_3\text{PW}_9\text{O}_{34}]$                                                                                                                                                                                     | $\{\text{Ni}_6\}$  |                                                                                     | $\{\text{PW}_9\text{O}_{34}\}$                                | 48 |
| $[\text{HNi}_{20}\text{X}_4\text{W}_{34}(\text{OH})_4\text{O}_{136}(\text{H}_2\text{O})_6(\text{enMe})_8]^{13-}$                                                                                                                                        | $\{\text{Ni}_6\}$  |                                                                                     | $\{\text{X}_4\text{W}_{34}\}$                                 | 49 |
| $\{[\text{Ni}_6(\mu_3\text{-OH})_3(\text{H}_2\text{O})_4(\text{en})(\text{CH}_3\text{COO})(\text{IN})(\text{B}-\text{PW}_9\text{O}_{34})]^{2-}$                                                                                                         | $\{\text{Ni}_6\}$  |                                                                                     | $\{\text{B}-\text{PW}_9\text{O}_{34}\}$                       | 50 |
| $[\text{H}_2\text{Ni}_{24}\text{P}_4\text{W}_{36}(\text{OH})_{12}\text{O}_{136}(\text{enMe})_{12}(\text{OAc})_4(\text{H}_2\text{O})_{12}]^{2-}$                                                                                                         | $\{\text{Ni}_6\}$  |                                                                                     | $\{\text{P}_4\text{W}_{36}\}$                                 | 51 |
| $\{[\text{Ni}_6(\text{OH})_3(\text{H}_2\text{O})_2(\text{en})_3(\text{Im})_2](\text{B}-\alpha\text{-PW}_9\text{O}_{34})\}$                                                                                                                              | $\{\text{Ni}_6\}$  |                                                                                     | $\{\text{B}-\alpha\text{-PW}_9\text{O}_{34}\}$                | 52 |

|                                                                                                                                                                                                                      |                      |                                                                                     |                                                                                         |    |
|----------------------------------------------------------------------------------------------------------------------------------------------------------------------------------------------------------------------|----------------------|-------------------------------------------------------------------------------------|-----------------------------------------------------------------------------------------|----|
| $[\{\text{Ni}_6(\mu_3\text{-OH})_3\text{en}(\text{H}_2\text{O})_{10}\}(\text{H}_2\text{P}_2\text{W}_{15}\text{O}_{56})]^-$                                                                                           | $\{\text{Ni}_6\}$    | 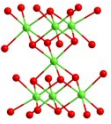   | $\{\text{H}_2\text{P}_2\text{W}_{15}\text{O}_{56}\}$                                    | 53 |
| $[\text{Ni}_6(\mu_3\text{-OH})_3(\text{oen})_3(\text{H}_2\text{O})_3(\text{B-}\alpha\text{-PW}_9\text{O}_{34})]$                                                                                                     | $\{\text{Ni}_6\}$    |                                                                                     | $\{\text{B-}\alpha\text{-PW}_9\text{O}_{34}\}$                                          | 54 |
| $[(\text{SiW}_8\text{O}_{31})_2\text{Ni}_7(\text{H}_2\text{O})_4(\text{OH})_6]^{12-}$                                                                                                                                | $\{\text{Ni}_7\}$    |    | $\{\text{SiW}_8\text{O}_{31}\}$                                                         | 33 |
| $[\text{Ni}_7(\text{OH})_4(\text{H}_2\text{O})(\text{CO}_3)_2(\text{HCO}_3)(\text{A-}\alpha\text{-SiW}_9\text{O}_{34})(\text{B-}\text{SiW}_{10}\text{O}_{37})]^{10-}$                                                | $\{\text{Ni}_7\}$    |    | $\{\text{A-}\alpha\text{-SiW}_9\text{O}_{34}\}$<br>$\{\text{B-SiW}_{10}\text{O}_{37}\}$ | 39 |
| $[\{\text{B-PW}_9\text{O}_{34}\}\text{Ni}_3(\text{OH})(\text{H}_2\text{O})_2(\text{O}_3\text{PC}(\text{O})(\text{C}_3\text{H}_6\text{N H}_3)(\text{PO}_3)_2\text{Ni})]^{14-}$                                        | $\{\text{Ni}_7\}$    |    | $\{\text{B-PW}_9\text{O}_{34}\}$                                                        | 55 |
| $[(\text{PW}_9\text{O}_{34})_2(\text{OH})_2(\text{H}_2\text{O})_4\text{M}_7(\text{O}_3\text{PC}(\text{O})(\text{C}_3\text{H}_6\text{NH}_2\text{CH}_2\text{C}_4\text{H}_9\text{S})\text{PO}_3)_2]^{14-}$ [M = Ni, Co] | $\{\text{Ni}_7\}$    |    | $\{\text{PW}_9\text{O}_{34}\}$                                                          | 56 |
| $[\text{H}_{12}\text{Ni}_8\text{P}_4\text{W}_{28}\text{O}_{120}]^{16-}$                                                                                                                                              | $\{\text{Ni}_8\}$    |  | $\{\text{P}_4\text{W}_{28}\text{O}_{120}\}$                                             | 57 |
| $[(\text{BO}_3)_2(\text{B}_2\text{O}_4(\text{OH})_2)_2\text{Ni}_8\text{O}_4(\text{SiW}_9\text{O}_{34})_2]^{26-}$                                                                                                     | $\{\text{Ni}_8\}$    |  | $\{\text{SiW}_9\text{O}_{34}\}$                                                         | 58 |
| $[(\text{A-}\alpha\text{-SiW}_9\text{O}_{34})_2\text{Ni}_9(\text{OH})_6(\text{H}_2\text{O})_6(\text{CO}_3)_3]^{14-}$                                                                                                 | $\{\text{Ni}_9\}$    |  | $\{\text{A-}\alpha\text{-SiW}_9\text{O}_{34}\}$                                         | 12 |
| $[\text{Ni}_9(\text{OH})_3(\text{H}_2\text{O})_6(\text{HPO}_4)_2(\text{PW}_9\text{O}_{34})_3]^{16-}$                                                                                                                 | $\{\text{Ni}_9\}$    |  | $\{\text{PW}_9\text{O}_{34}\}$                                                          | 59 |
| $[\text{Ni}_{11}(\text{PW}_9\text{O}_{34})_2(\text{IDA})_3(\text{en})_2(\text{Hen})_2(\text{OH})_6]$                                                                                                                 | $\{\text{Ni}_{11}\}$ |  | $\{\text{PW}_9\text{O}_{34}\}$                                                          | 60 |
| $[\text{Ni}_{12}(\text{OH})_9\text{WO}_4(\text{W}_7\text{O}_{26}(\text{OH}))(\text{PW}_9\text{O}_{34})_3]^{25-}$                                                                                                     | $\{\text{Ni}_{12}\}$ |  | $\{\text{PW}_9\text{O}_{34}\}$                                                          | 61 |
| $[(\text{BO}_3)_3\text{PO}_4\text{Ni}_{12}\text{O}_9(\text{SiW}_9\text{O}_{34})_3]^{36-}$                                                                                                                            | $\{\text{Ni}_{12}\}$ |  | $\{\text{SiW}_9\text{O}_{34}\}$                                                         | 58 |
| $[\text{Ni}_{12}(\text{OH})_9(\text{CO}_3)_3(\text{PO}_4)(\text{SiW}_9\text{O}_{34})_3]^{24-}$                                                                                                                       | $\{\text{Ni}_{12}\}$ |  | $\{\text{SiW}_9\text{O}_{34}\}$                                                         | 62 |
| $[\text{Ni}_{13}(\text{H}_2\text{O})_3(\text{OH})_9(\text{PO}_4)_4(\text{SiW}_9\text{O}_{34})_3]^{25-}$                                                                                                              | $\{\text{Ni}_{13}\}$ |  | $\{\text{SiW}_9\text{O}_{34}\}$                                                         | 62 |
| $[\text{Ni}_{14}(\text{OH})_6(\text{H}_2\text{O})_{10}(\text{HPO}_4)_4(\text{P}_2\text{W}_{15}\text{O}_{56})_4]^{34-}$                                                                                               | $\{\text{Ni}_{14}\}$ |  | $\{\text{P}_2\text{W}_{15}\text{O}_{56}\}$                                              | 64 |
| $[\{\text{Ni}_4(\text{OH})_3\text{AsO}_4\}_4(\text{B-}\alpha\text{-PW}_9\text{O}_{34})_4]^{28-}$                                                                                                                     | $\{\text{Ni}_{16}\}$ |                                                                                     | $\{\text{B-}\alpha\text{-PW}_9\text{O}_{34}\}$                                          | 65 |



|                                                                                                                                                                       |                                     |                                                                                     |                                                                                   |                                 |
|-----------------------------------------------------------------------------------------------------------------------------------------------------------------------|-------------------------------------|-------------------------------------------------------------------------------------|-----------------------------------------------------------------------------------|---------------------------------|
| $[\{\text{Ni}_4(\text{OH})_3(\text{PO}_4)\}_4(\text{A-PW}_9\text{O}_{34})_4]^{28-}$                                                                                   | $\{\text{Ni}_{16}\}$                | 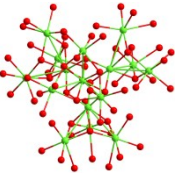   | $\{\text{A-PW}_9\text{O}_{34}\}$                                                  | 66                              |
| $[\{\text{Ni}_4(\text{OH})_3(\text{PO}_4)\}_4(\text{A-PW}_9\text{O}_{34})_2(\text{B-PW}_9\text{O}_{34})_2]^{28-}$                                                     | $\{\text{Ni}_{16}\}$                |    | $\{\text{A-PW}_9\text{O}_{34}\} \{\text{B-PW}_9\text{O}_{34}\}$                   | 66                              |
| $[\{\text{Ni}_4(\text{OH})_3(\text{VO}_4)\}_4(\text{B-PW}_9\text{O}_{34})_4]^{28-}$                                                                                   | $\{\text{Ni}_{16}\}$                |                                                                                     | $\{\text{B-PW}_9\text{O}_{34}\}$                                                  | 66                              |
| $[\text{Ni}_{25}(\text{H}_2\text{O})_2(\text{OH})_{18}(\text{CO}_3)_2(\text{PO}_4)_6(\text{SiW}_9\text{O}_{34})_6]^{50-}$                                             | $\{\text{Ni}_{25}\}$                |                                                                                     |  | $\{\text{SiW}_9\text{O}_{34}\}$ |
| $[\{\{\text{AsW}_6\text{O}_{26}\text{Ni}_6(\text{OH})_2(\text{H}_2\text{O})_3(\text{en})(\text{AsW}_9\text{O}_{34})\}_2]^{-}$                                         | $2\{\text{Ni}_6\}+2\{\text{Ni}_3\}$ |    | $\{\text{AsW}_6\text{O}_{26}\} \{\text{AsW}_9\text{O}_{34}\}$                     | 67                              |
| $[\{\{\text{AsW}_6\text{O}_{26}\text{Ni}_6(\text{OH})_2(\text{en})_{2.5}(\text{AsW}_9\text{O}_{34})\}_2\text{H}_4[\text{W}_4\text{O}_{16}]^{-}$                       | $2\{\text{Ni}_6\}+2\{\text{Ni}_4\}$ |    | $\{\text{AsW}_6\text{O}_{26}\} \{\text{AsW}_9\text{O}_{34}\}$                     | 67                              |
| $[\text{H}_6\text{Ni}_{20}\text{P}_4\text{W}_{34}(\text{OH})_4\text{O}_{136}(\text{enMe})_8(\text{H}_2\text{O})_6]^{6-}$                                              | $2\{\text{Ni}_6\}+2\{\text{Ni}_4\}$ |   | $\{\text{B-}\alpha\text{-PW}_9\text{O}_{34}\}$                                    | 68                              |
| $[\text{Ni}_{12}\text{O}_9(\text{PO}_4)_6(\text{SiW}_9\text{O}_{34})(\text{Si}_2\text{W}_{22}\text{O}_{79})]^{40-}$                                                   | $\{\text{Ni}_{12}\}$                |  | $\{\text{SiW}_9\text{O}_{34}\} \{\text{Si}_2\text{W}_{22}\text{O}_{79}\}$         | This work                       |
| $[\{\{\text{Ni}(\text{C}_4\text{N}_3\text{H}_{13})\}_4[\text{Ni}_8(\text{OH})_2][\text{B}_4\text{O}_4(\text{H}_2\text{O})_8](\text{SiW}_{10}\text{O}_{37})_4\}^{14-}$ | $\{\text{Ni}_6\}$                   |  | $\{\text{SiW}_{10}\text{O}_{37}\}$                                                |                                 |

*m* and *n* refer to the number of metal cores within a polyanion and the number of metals within a core, respectively. Ni: green balls, O: red balls, N: dark blue balls, C: gray balls, S: azure balls.

**Table S2** Bond valence sum calculations of the O in  $\text{Ni}_{12}(\text{OH})_9$

| Atom Code       | Bond Valence | Valence state | Atom Code       | Bond Valence | Valence state | Atom Code       | Bond Valence | Valence state |
|-----------------|--------------|---------------|-----------------|--------------|---------------|-----------------|--------------|---------------|
| O <sub>26</sub> | 1.28369      | 1             | O <sub>42</sub> | 1.30941      | 1             | O <sub>79</sub> | 1.32438      | 1             |
| O <sub>35</sub> | 0.81522      | 1             | O <sub>58</sub> | 1.29452      | 1             |                 |              |               |

**Table S3** Bond valence sum calculations of the O in  $\text{W}_4\text{O}_{10}(\text{OH})$

| Atom Code       | Bond Valence | Valence state | Atom Code       | Bond Valence | Valence state | Atom Code       | Bond Valence | Valence state |
|-----------------|--------------|---------------|-----------------|--------------|---------------|-----------------|--------------|---------------|
| O <sub>6</sub>  | 1.60623      | 2             | O <sub>15</sub> | 1.62147      | 2             | O <sub>56</sub> | 1.01455      | 1             |
| O <sub>12</sub> | 1.54068      | 2             | O <sub>48</sub> | 1.56701      | 2             | O <sub>76</sub> | 1.88242      | 2             |

**Table S4** Bond valence sum calculations of the O in  $\text{P}_4\text{O}_2(\text{OH})_2$

| Atom Code       | Bond Valence | Valence state | Atom Code       | Bond Valence | Valence state | Atom Code       | Bond Valence | Valence state |
|-----------------|--------------|---------------|-----------------|--------------|---------------|-----------------|--------------|---------------|
| O <sub>27</sub> | 1.39794      | 1             | O <sub>39</sub> | 1.15283      | 1             | O <sub>40</sub> | 1.71397      | 2             |
| O <sub>49</sub> | 1.75081      | 2             |                 |              |               |                 |              |               |

**Table S5** Bond valence sum calculations of the O in Ni<sub>6</sub>(OH)

| Atom Code       | Bond Valence | Valence state | Atom Code       | Bond Valence | Valence state |
|-----------------|--------------|---------------|-----------------|--------------|---------------|
| O <sub>21</sub> | 1.19507      | 1             | O <sub>60</sub> | 1.17714      | 1             |

**Table S6** Various experimental conditions of **2**

| Entry           | <b>2</b> TON <sub>CO</sub> <sup>a</sup> | <b>2</b> TON <sub>CH<sub>4</sub></sub> <sup>b</sup> | <b>2</b> TON <sub>H<sub>2</sub></sub> <sup>c</sup> | <b>2</b> TON <sup>d</sup> |
|-----------------|-----------------------------------------|-----------------------------------------------------|----------------------------------------------------|---------------------------|
| 1               | 69.88                                   | 0                                                   | 13.15                                              | 83.03                     |
| 2 <sub>e</sub>  | 0.13                                    | 0.01                                                | 0.09                                               | 0.23                      |
| 3 <sub>f</sub>  | 0                                       | 1                                                   | 0                                                  | 1                         |
| 4 <sub>g</sub>  | 0                                       | 0                                                   | 0                                                  | 0                         |
| 5 <sub>h</sub>  | 0                                       | 0                                                   | 0                                                  | 0                         |
| 6 <sub>i</sub>  | 0                                       | 0.20                                                | 0                                                  | 0.20                      |
| 7 <sub>j</sub>  | 2                                       | 0                                                   | 0                                                  | 2                         |
| 8 <sub>k</sub>  | 8.02                                    | 0.04                                                | 0                                                  | 8.06                      |
| 9 <sub>l</sub>  | 0                                       | 0                                                   | 0                                                  | 0                         |
| 10 <sup>m</sup> | 0.13                                    | 0                                                   | 0                                                  | 0.13                      |

Reaction conditions: compounds (0.1 μmol), [Ru(bpy)<sub>3</sub>]Cl<sub>2</sub>·6H<sub>2</sub>O (0.01 mmol) triethanolamine (TEOA, 1 mL), H<sub>2</sub>O (1 mL) and acetonitrile (MeCN, 4 mL). The reaction setup was alternately vacuum degassed and purged with CO<sub>2</sub> three times, after which high-purity CO<sub>2</sub> was purged again for 30 min, λ ≥ 420 nm, 30 °C, 1 h.

a. Turnover number ( $n_{\text{CO}}/n_{\text{Compound}}$ ). b. Turnover number ( $n_{\text{CH}_4}/n_{\text{Compound}}$ ). c. Turnover number ( $n_{\text{H}_2}/n_{\text{Compound}}$ ). d. Turnover number  $[(n_{\text{CO}} + n_{\text{CH}_4} + n_{\text{H}_2})/n_{\text{Compound}}]$ . e. Without **2**. f. Without [Ru(bpy)<sub>3</sub>]Cl<sub>2</sub>·6H<sub>2</sub>O. g. Without TEOA. h. Using N<sub>2</sub> to replace CO<sub>2</sub>. i. In the dark. j. Using Na<sub>10</sub>[A-α-SiW<sub>9</sub>O<sub>34</sub>] (0.4 μmol) to replace **2**. k. Using Ni(Ac)<sub>2</sub>·4H<sub>2</sub>O (1.37 μmol) to replace **2**. l. Using K<sub>2</sub>B<sub>10</sub>O<sub>16</sub>·8H<sub>2</sub>O (1.96 μmol) to replace **2**. m. Using DETA (9.29 μmol) to replace **2**.

### 3. References

- [1] P. Mialane, A. Dolbecq, E. Riviere, J. Marrot and F. Secheresse, A Polyoxometalate Containing the  $\{Ni_2N_3\}$  Fragment: Ferromagnetic Coupling in a Ni<sup>II</sup>  $\mu$ -1,1 Azido Complex with a Large Bridging Angle, *Angew. Chem., Int. Ed.*, 2004, **43**, 2274-2277.
- [2] Y. Hou, L. Xu, M. J. Cichon, S. Lense, K. I. Hardcastle and C. L. Hill, A New Family of Sandwich-Type Polytungstophosphates Containing Two Types of Metals in the Central Belt:  $M'_2M_2(PW_9O_{34})_2^{12-}$  ( $M' = Na$  or  $Li$ ,  $M = Mn^{2+}$ ,  $Co^{2+}$ ,  $Ni^{2+}$ , and  $Zn^{2+}$ ), *Inorg. Chem.*, 2010, **49**, 4125-4132.
- [3] R. S. Winter, D. L. Long and L. Cronin, Synthesis and Characterization of a Series of  $[M_2\{\beta-SiW_8O_{31}\}_2]^{n-}$  Clusters and Mechanistic Insight into the Reorganization of  $\{\beta-SiW_8O_{31}\}$  into  $\{\alpha-SiW_9O_{34}\}$ , *Inorg. Chem.*, 2015, **54**, 4151-4155.
- [4] I. M. Mbomekalle, P. Mialane, A. Dolbecq, J. Marrot, F. Sécheresse, P. Berthet, B. Keita and L. Nadjo, Rational Synthesis, Structure, Magnetism and Electrochemistry of Mixed Iron-Nickel-Containing Wells-Dawson-Fragment-Based Sandwich-Type Polyoxometalates, *Eur. J. Inorg. Chem.*, 2009, 5194-5204.
- [5] D. Gabb, C. P. Pradeep, H. N. Miras, S. G. Mitchell, D. L. Long and L. Cronin, Organic-soluble lacunary  $\{M_2(P_2W_{15})_2\}$  polyoxometalate sandwiches showing a previously unseen  $\alpha\beta\beta\alpha$  isomerism, *Dalton Trans.*, 2012, **41**, 10000-10005.
- [6] I. M. Mbomekalle, B. Keita, M. Nierlich, U. Kortz, P. Berthet and L. Nadjo, Structure, Magnetism, and Electrochemistry of the Multinickel Polyoxoanions  $[Ni_6As_3W_{24}O_{94}(H_2O)_2]^{17-}$ ,  $[Ni_3Na(H_2O)_2(AsW_9O_{34})_2]^{11-}$ , and  $[Ni_4Mn_2P_3W_{24}O_{94}(H_2O)_2]^{17-}$ , *Inorg. Chem.*, 2003, **42**, 5143-5152.
- [7] I. M. Mbomekalle, B. Keita, L. Nadjo and P. Berthet, Direct and improved synthesis of the tri-nickel sandwich-type polyoxoanion  $[Ni_3Na(H_2O)_2(PW_9O_{34})_2]^{11-}$ , *Inorg. Chem. Commun.*, 2003, **6**, 435-438.
- [8] D. Schaming, J. Canny, K. Boubekeur, R. Thouvenot and L. Ruhlmann, An Unprecedented Trinuclear Dawson Sandwich Complex with Internal Lacuna: Synthesis and  $^{31}P$  NMR Spectroscopic Analysis of the Symmetrical  $[NaNi_3(H_2O)_2(P_2W_{15}O_{56})_2]^{17-}$  and  $[CoNi_3(H_2O)_2(P_2W_{15}O_{56})_2]^{16-}$  Anions, *Eur. J. Inorg. Chem.*, 2009, 5004-5009.
- [9] W. W. Guo, H. J. Lv, J. Bacsá, Y. Z. Gao, J. S. Lee and C. L. Hill, Syntheses, Structural Characterization, and Catalytic Properties of Di- and Trinickel Polyoxometalates, *Inorg. Chem.*, 2016, **55**, 461-466.
- [10] L. L. Chu, B. B. Zhou, C. X. Wang, Z. F. Zhao, Z. H. Su and K. Yu, Synthesis, crystal structure and property of a novel Nickel-containing tungstophosphate  $[Na_3(H_2O)_8\{Ni_3(H_2O)\}(B-\alpha-PW_9O_{34})(B-\beta-PW_8O_{31})_2]^{21-}$ , *Solid. State. Sci.*, 2011, **13**, 488-491.
- [11] J. P. Wang, G. Chen, W. Wang and J. Y. Niu, Hydrothermal Synthesis and Structural Characterization of an Inorganic-Organic Hybrid Sandwich-type Germanotungstate, *Chem. Lett.*, 2008, **37**, 1136.
- [12] C. Pichon, P. Mialane, A. Dolbecq, J. Marrot, E. Rivière, B. S. Bassil, U. Kortz, B. Keita, L. Nadjo and F. Sécheresse, Octa- and Nonanuclear Nickel(II) Polyoxometalate Clusters: Synthesis and Electrochemical and Magnetic Characterizations, *Inorg. Chem.*, 2008, **47**, 11120-11128.
- [13] G. Rousseau, O. Oms, A. Dolbecq, J. Marrot and P. Mialane, Route for the Elaboration of Functionalized Hybrid 3d-Substituted Trivacant Keggin Anions, *Inorg. Chem.*, 2011, **50**, 7376-7378.
- [14] C. Pichon, P. Mialane, A. Dolbecq, J. Marrot, E. Rivière, B. S. Bassil, U. Kortz, B. Keita, L. Nadjo and F. Sécheresse, Octa- and Nonanuclear Nickel(II) Polyoxometalate Clusters: Synthesis and Electrochemical and Magnetic Characterizations, *Inorg. Chem.*, 2008, **47**, 11120-11128.
- [15] G. Rousseau, E. Rivière, A. Dolbecq, J. Marrot, O. Oms and P. Mialane, Monomeric, Dimeric Helical, and 1D Nickel Polyoxotungstates Structured by Carboxylate Derivatives, *Eur. J. Inorg. Chem.*, 2013, **2013**, 1793-1798.
- [16] J. W. Zhao, B. Li, S. T. Zheng and G. Y. Yang, Two-Dimensional Extended (4,4)-Topological Network Constructed from Tetra-Ni<sup>II</sup>-Substituted Sandwich-Type Keggin Polyoxometalate Building Blocks and Ni<sup>II</sup>-Organic Cation Bridges, *Cryst. Growth Des.*, 2007, **7**, 2658-2664.
- [17] J. W. Zhao, S. T. Zheng and G. Y. Yang, Hydrothermal synthesis and structural characterization of three inorganic-organic composite sandwich-type phosphotungstates, *J. Solid State Chem.*, 2007, **180**, 3317-3324.
- [18] Z. M. Zhang, J. Liu, E. B. Wang, C. Qin, Y. G. Li, Y. F. Qia and X. L. Wang, Two extended structures constructed from sandwich-type polyoxometalates functionalized by organic amines, *Dalton Trans.*, 2008, 463-468.
- [19] Z. H. Yi, X. B. Cui, X. Zhang, J. Q. Xu, G. D. Yang, Y. Chen, T. G. Wang, X. Y. Yu, A novel 2D layer structure constructed from sandwich-type transition metal substituted tungstates and nickel coordination fragments:  $\{[Ni(enMe)_2]_2[Ni(enMe)_2(H_2O)]_2[As_2W_{18}Ni_4(enMe)_2O_{68}]\cdot 2H_3O\cdot 2H_2O\}$ , *J. Mol. Struct.*, 2008, **885**, 149-153.
- [20] N. H. Nsouli, M. Prinz, N. Damník, M. Neumann, E. Talik and U. Kortz, Dimeric Nickel(II) Containing Tungstogermanate  $\{[\beta-GeNi_2W_{10}O_{36}(OH)_2(H_2O)]_2\}^{12-}$ , *Eur. J. Inorg. Chem.*, 2009, 5096-5101.
- [21] J. P. Wang, P. T. Ma, Y. Shen and J. Y. Niu, Tetra-Transition-Metal Substituted Weakley-Type Sandwich Germanotungstates and their Derivatives Decorated by Transition-Metal Complexes, *Cryst. Growth Des.*, 2008, **8**, 3130-3133.
- [22] B. Li, D. Zhao, S. T. Zheng and G. Y. Yang, Hydrothermal Synthesis and Structural Characterization of Two Organic-Inorganic Hybrids Based on Sandwich-type Polyoxometalates, *J. Cluster. Sci.*, 2008, **19**, 641-650.
- [23] G. W. Wang, Y. Chen, Y. C. Zou, Y. Wang, H. T. Wang, K. C. Li, X. B. Cui, S. Y. Shi and J. Q. Xu, A novel sandwich-type POM supported transition metal coordination complexes:  $\{P_2^vW_{18}^vNi_4(H_2O)_2O_{68}[Ni(en)_2(H_2O)]_2[Ni(en)_3]_2[Ni(en)_2(H_2O)_2]\cdot 14H_2O\}$ , *Inorg. Chem. Commun.*, 2009, **12**, 646-649.

- [24] L. J. Chen, Y. H. Fan, J.W. Zhao, P. T. Ma, D. Y. Shi, J. P. Wang and Jingyang Niu, Hydrothermal syntheses and structural characterization of two sandwich-type arsenotungstates, *J. Coord. Chem.*, 2010, **63**, 2042-2055.
- [25] P. T. Ma, J. W. Zhao, J. P. Wang, Y. Shen and J. Y. Niu, Sandwich-type polyoxotungstate hybrids decorated by nickel-aromatic amine complexes, *J. Solid State Chem.*, 2010, **183**, 150-156.
- [26] Y. C. Wang, L. Xu, N. Jiang, X. Z. Liu, F. Y. Li and Y. G. Li, Ligand substitution in sandwich-type complexes of germanotungstates: Syntheses, crystal structures and magnetic properties, *Inorg. Chem. Commun.*, 2010, **13**, 964-967.
- [27] Z. G. Han, Y. N. Wang, X. J. Song, J. Huang and X. L. Zhai, Assemblies based on the directing effect of non-classical  $W_{18}$  anionic clusters and the rod-like trans-1,2-di-(4-pyridyl)-ethylen (bpe), *J. Solid. State. Chem.*, 2011, **184**, 690-697.
- [28] P. T. Ma, Y. Wang, H. N. Chen, J. P. Wang and J. Y. Niu, A new 1-D chain-like organic-inorganic hybrid phosphotungstate constructed by sandwich-type clusters and  $[Ni(en)_2]^{2+}$  linkers, *J. Coord. Chem.*, 2011, **64**, 2497-2505.
- [29] Z. G. Han, Y. N. Wang, X. J. Song, X. L. Zhai and Changwen Hu, Molecular Assemblies Based on Polytungstate Clusters and the Flexible Organic Ligand 1,3-Bis(4-pyridyl)propane, *Eur. J. Inorg. Chem.*, 2011, **2011**, 3082-3090.
- [30] X. X. Li, W. H. Fang and G.Y. Yang, Hydrothermal synthesis and crystal structure of a novel sandwich germanotungstate:  $[Ni(dien)(H_2O)_3]_2[Ni(Hdien)_2]\{[Ni(dien)]_2Ni_4(H_2O)_2(GeW_9O_{34})_2\} \cdot 10H_2O$ , *Chem. J. Chinese. U.*, 2011, **32**, 571-576.
- [31] L. Yang, X. Ma, P.T. Ma, J. Hua and J. Y. Niu, A Series of Arsenotungstates Based on the  $[HAS_2W_8O_{31}]^{7-}$  Building Block: Syntheses by Control of the Reaction Process, *Cryst. Growth. Des.*, 2013, **13**, 2982-2989.
- [32] Y. Q. Xu, Y. Z. Li, J. W. Zhao, D. Y. Shi and L. J. Chen, Hydrothermal Synthesis and Structural Characterization of a 1-D Inorganic-Organic Composite Tetra-Nickel Substituted Sandwich-Type Phosphotungstate, *Synth. React. Inorg.*, 2014, **44**, 118-124.
- [33] Z. M. Zhang, E. B. Wang, Y. F. Qi, Y. G. Li, B. D. Mao and Z.M. Su, Synthesis, Characterization, and Crystal Structures of Double-Cubane-Substituted and Asymmetric Penta-Ni-Substituted Dimeric Polyoxometalates, *Cryst. Growth Des.*, 2007, **7**, 1305-1311.
- [34] G. B. Zhu, E. N. Glass, C. C. Zhao, H. J. Lv, J. W. Vickers, Y. V. Geletii, D. G. Musaev, J. Song and C. L. Hill, A nickel containing polyoxometalate water oxidation catalyst, *Dalton Trans.*, 2012, **41**, 13043-13049.
- [35] J. Y. Guo, D. Zhang, L. Chen, Y. Song, D. R. Zhu and Y. Xu, Syntheses, structures and magnetic properties of two unprecedented hybrid compounds constructed from open Wells-Dawson anions and high-nuclear transition metal clusters, *Dalton Trans.*, 2013, **42**, 8454-8459.
- [36] G. J. Cao, J. D. Liu, T. T. Zhuang, X. H. Cai and S. T. Zheng, A polyoxometalate-organic supramolecular nanotube with high chemical stability and proton-conducting properties, *Chem. Commun.*, 2015, **51**, 2048-2051.
- [37] J. P. Wang, P. T. Ma, Y. Shen and J. Y. Niu, A Novel Polyoxotungstate  $[Ni_4(H_2O)_2(\alpha-NiW_9O_{34})_2]^{16-}$  Based on an Old Structure with a New Component, *Cryst. Growth. Des.*, 2007, **7**, 603-605.
- [38] Z. F. Zhao, B. B. Zhou, S. T. Zheng, Z. H. Su and C. M. Wang, Hydrothermal synthesis, crystal structure and magnetic characterization of three hexa-M substituted tungstoarsenates (M = Ni, Zn and Mn), *Inorg. Chim. Acta.*, 2009, **362**, 5038-5042.
- [39] Z. M. Zhang, Y. G. Li, E. B. Wang, X. Wang, C. Qin and H. Y. An, Synthesis, Characterization, and Crystal Structures of Two Novel High-Nuclear Nickel-Substituted Dimeric Polyoxometalates, *Inorg. Chem.*, 2006, **45**, 4313-4315.
- [40] W. J. Niu, D. Y. Shi, J. W. Zhao, X. M. Cai and L. J. Chen, An organic-inorganic hybrid hexa-nickel substituted sandwich-type germanotungstate  $[enH_2]_2[Ni(en)_2]_2\{[Ni_6(en)_2(H_2O)_2][B-\alpha-GeW_9O_{34}]_2\} \cdot 14H_2O$ , *Inorg. Chem. Commun.*, 2012, **17**, 79-83.
- [41] J. W. Zhao, J. Zhang, Y. Song, S. T. Zheng and G. Y. Yang, Two Hexanickel-Substituted Keggin-Type Germanotungstates, *Eur. J. Inorg. Chem.*, 2008, 3809-3819.
- [42] S. T. Zheng, D. Q. Yuan, H. P. Jia, J. Zhang and G. Y. Yang, Combination between lacunary polyoxometalates and high-nuclear transition metal clusters under hydrothermal conditions: I. from isolated cluster to 1-D chain, *Chem. Commun.*, 2007, 1858-1860.
- [43] X. X. Li, W. H. Fang, J. W. Zhao and G. Y. Yang, Hydrothermal Combination of Trilacunary Dawson Phosphotungstates and Hexanickel Clusters: From an Isolated Cluster to a 3D Framework, *Chem. Eur. J.*, 2014, **20**, 17324-17332.
- [44] J. W. Zhao, H. P. Jia, J. Zhang, S. T. Zheng and G. Y. Yang, A Combination of Lacunary Polyoxometalates and High-Nuclear Transition-Metal Clusters under Hydrothermal Conditions. Part II: From Double Cluster, Dimer, and Tetramer to Three-Dimensional Frameworks, *Chem. Eur. J.*, 2007, **13**, 10030-10045.
- [45] S. T. Zheng, J. Zhang and G.Y. Yang, Designed Synthesis of POM-Organic Frameworks from  $\{Ni_6PW_9\}$  Building Blocks under Hydrothermal Conditions, *Angew. Chem., Int. Ed.*, 2008, **47**, 3909-3913.
- [46] L. J. Chen, J. W. Zhao, P. T. Ma, Q. X. Han, J. P. Wang and J. Y. Niu, An organic-inorganic hybrid nickel-substituted arsenotungstate consisting of three types of polyoxotungstate units, *Inorg. Chem. Commun.*, 2010, **13**, 50-53.
- [47] X. X. Li, S. T. Zheng, W. H. Fang and G. Y. Yang, A series of  $Ni_6$ -substituted polyoxometalates derived from tripodal alcohol ligands, *Inorg. Chem. Commun.*, 2011, **14**, 1541-1545.
- [48] X. X. Li, W. H. Fang, J. W. Zhao and G.Y. Yang, The First 3-Connected  $SrSi_2$ -Type 3D Chiral Framework Constructed from  $\{Ni_6PW_9\}$  Building Units, *Chem. Eur. J.*, 2015, **21**, 2315-2318.

- [49] X. X. Li, S. T. Zheng, J. Zhang, W. H. Fang, G. Y. Yang and J. M. Clemente-Juan, High-Nuclearity Ni-Substituted Polyoxometalates: A Series of Poly(polyoxotungstate)s Containing 20-22 Nickel Centers, *Chem. Eur. J.*, 2011, **17**, 13032-13043.
- [50] X. X. Liu, X. L. Wang, G. S. Yang, G. Yuan, L. J. Li, K. Z. Shao, Z. M. Su and H. M. Xie, Hydrothermal synthesis and structural characterization of a new 2D inorganic-organic hybrid compound based on  $\{\text{Ni}_6\text{PW}_9\}_2$  subunit, *Inorg. Chem. Commun.*, 2012, **23**, 21-24.
- [51] L. Huang, J. Zhang, L. Cheng and G. Y. Yang, Poly(polyoxometalate)s assembled by  $\{\text{Ni}_6\text{PW}_9\}$  units: from ring-shaped  $\text{Ni}_{24}$ -tetramers to rod-shaped  $\text{Ni}_{40}$ -octamers, *Chem. Commun.*, 2012, **48**, 9658-9660.
- [52] J. W. Liu, Y. C. Liu, H. He, B. F. Yang and G. Y. Yang, Novel organic-inorganic hybrid monomeric Keggin-type phosphotungstate containing heterometallic  $\{\text{Ni}_6\text{W}_n\text{Ni}\}$  clusters, *Inorg. Chem. Commun.*, 2015, **53**, 60-63.
- [53] X. Q. Wang, S. X. Liu, Y. W. Liu, D. F. He, N. Li, J. Miao, Y. J. Ji and G. Y. Yang, Planar  $\{\text{Ni}_6\}$  Cluster-Containing Polyoxometalate-based Inorganic-Organic Hybrid Compound and Its Extended Structure, *Inorg. Chem.*, 2014, **53**, 13130-13135.
- [54] B. Cai, J. W. Zhao, B. F. Yang, H. He and G. Y. Yang, Temperature-Dependent Organic Functionalization of  $\{\text{Ni}_6\text{PW}_9\}$  Species: from Isolated Clusters to 1D Chain, *J. Cluster. Sci.*, 2014, **25**, 1069-1084.
- [55] H. E. Moll, G. Rousseau, A. Dolbecq, O. Oms, J. Marrot, M. Haouas, F. Taulelle, E. Rivire, W. Wernsdorfer, D. Lachkar, E. Lacte, B. Keita and P. Mialane, Properties of a Tunable Multinuclear Nickel Polyoxotungstate Platform, *Chem. Eur. J.*, 2013, **19**, 6753-6765.
- [56] A. Saad, N. Anwar, G. Rousseau, P. Mialane, J. Marrot, M. Haouas, F. Taulelle, T. M. Cormac and A. Dolbecq, Covalent Attachment of Thiophene Groups to Polyoxomolybdates or Poly-oxotungstates for the Formation of Hybrid Films, *Eur. J. Inorg. Chem.*, 2015, **2015**, 4775-4782.
- [57] B. Godin, J. Vaissermann, P. Herson, L. Ruhlmann, M. Verdagner and P. Gouzerh, Coordination chemistry of the hexavacant tungstophosphate  $[\text{H}_2\text{P}_2\text{W}_{12}\text{O}_{48}]^{12-}$ : synthesis and characterization of iron(III) complexes derived from the unprecedented  $\{\text{P}_2\text{W}_{14}\text{O}_{54}\}$  fragment, *Chem. Commun.*, 2005, 5624-5626.
- [58] S. J. Li, S. X. Liu, Q. Tang, Y. W. Liu, D. F. He, S. T. Wang and Z. Shi, Borate-templated self-assembly of multinuclear nickel(II)-containing POMs, *Dalton. Trans.*, 2013, **42**, 13319-13322.
- [59] J. M. Clemente-Juan, E. Coronado, J. R. Galán-Mascarós and C. J. Gómez-García, Increasing the Nuclearity of Magnetic Polyoxometalates. Syntheses, Structures, and Magnetic Properties of Salts of the Heteropoly Complexes  $[\text{Ni}_3(\text{H}_2\text{O})_3(\text{PW}_{10}\text{O}_{39})\text{H}_2\text{O}]^{7-}$ ,  $[\text{Ni}_4(\text{H}_2\text{O})_2(\text{PW}_9\text{O}_{34})_2]^{10-}$ , and  $[\text{Ni}_9(\text{OH})_3(\text{H}_2\text{O})_6(\text{HPO}_4)_2(\text{PW}_9\text{O}_{34})_3]^{16-}$ , *Inorg. Chem.*, 1999, **38**, 55-63.
- [60] Y. Y. Zheng, R. Wen, X. J. Kong, L. S. Long, R. B. Huang and L. S. Zheng, Assembly of an undeca-nuclear nickel substituted POM through polycarboxylate ligand, *Dalton Trans.*, 2012, **41**, 9871-9875.
- [61] H. M. Zhang, Y. G. Li, Y. Lu, R. Cleerac, Z. M. Zhang, Q. Wu, X. J. Feng and E. B. Wang, A New  $\text{Ni}_{12}$  Cluster Based on Polyoxometalate Ligands, *Inorg. Chem.*, 2009, **48**, 10889-10891.
- [62] X. B. Han, Y. G. Li, Z. M. Zhang, H. Q. Tan, Y. Lu and E. B. Wang, Polyoxometalate-Based Nickel Clusters as Visible Light-Driven Water Oxidation Catalysts, *J. Am. Chem. Soc.*, 2015, **137**, 5486-5493.
- [63] S. J. Li, S. X. Liu, Q. Tang, Y. W. Liu, D. F. He, S. T. Wang and Z. Shi, Borate-templated self-assembly of multinuclear nickel(II)-containing POMs, *Dalton. Trans.*, 2013, **42**, 13319-13322.
- [64] M. Ibrahim, Y. X. Xiang, B. S. Bassil, Y. H. Lan, A. K. Powell, P. D. Oliveira, B. Keita and U. Kortz, Synthesis, Magnetism, and Electrochemistry of the  $\text{Ni}_{14}$ - and  $\text{Ni}_5$ -Containing Heteropolytungstates  $[\text{Ni}_{14}(\text{OH})_6(\text{H}_2\text{O})_{10}(\text{HPO}_4)_4(\text{P}_2\text{W}_{15}\text{O}_{56})_4]^{34-}$  and  $[\text{Ni}_5(\text{OH})_4(\text{H}_2\text{O})_4(\beta\text{-GeW}_9\text{O}_{34})(\beta\text{-GeW}_8\text{O}_{30}(\text{OH}))]^{13-}$ , *Inorg. Chem.*, 2013, **52**, 8399-8408.
- [65] H. J. Lv, Y. N. Chi, J. V. Leusen, P. Kçgerler, Z. Y. Chen, J. Bacsa, Y. V. Geletii, W. W. Guo, T. Q. Lian and C. L. Hill,  $[\{\text{Ni}_4(\text{OH})_3\text{AsO}_4\}_4(\text{B-}\alpha\text{-PW}_9\text{O}_{34})_4]^{28-}$ : A New Polyoxometalate Structural Family with Catalytic Hydrogen Evolution Activity, *Chem. Eur. J.*, 2015, **21**, 17363-17370.
- [66] X. B. Han, C. Qin, X. L. Wang, Y. Z. Tan, X. J. Zhao and E. B. Wang, Bio-inspired assembly of cubane-adjustable polyoxometalate-based high-nuclear nickel clusters for visible light-driven hydrogen evolution, *Appl. Catal. B- Environ.*, 2017, **211**, 349-356.
- [67] J. W. Zhao, D. Y. Shi, L. J. Chen, P. T. Ma, J. P. Wang and J. Y. Niu, Two 1-D multi-nickel substituted arsenotungstate aggregates, *Cryst. Eng. Comm.*, 2011, **13**, 3462-3469.
- [68] S. T. Zheng, J. Zhang, J. M. Clemente-Juan, D. Q. Yuan, and G. Y. Yang, Poly(polyoxotungstate)s with 20 Nickel Centers: From Nanoclusters to One-Dimensional Chains, *Angew. Chem., Int. Ed.*, 2009, **48**, 7176-7179.
